# Supplementary material for: Insight into the inhibitory potential of metal complexes supported by (E)-2-morpholino-N-(thiophen-2-ylmethylene)ethanamine: synthesis, structural properties, biological evaluation and docking studies
Source: Royal Society of Chemistry journal article supplement (doi:10.1039/d4dt00362d), 2024-01-01
Supplement: d4dt00362d1.pdf [file d4dt00362d1.pdf]

## Supporting Information

### Insighting the Inhibitory Potential of Metal Complexes Supported by (*E*)-2-Morpholino-*N*-(thiophen-2-ylmethylene)ethanamine: Synthesis, Structural Properties, Biological Evaluation and Docking Studies

Saira Nayab,<sup>a,f</sup> Kalsoom Jan,<sup>b,c</sup> Seung-Hyeon Kim,<sup>d</sup> Sa-Hyun Kim,<sup>d</sup> Dilawar Farhan

Shams,<sup>e</sup> Younghu Son,<sup>f</sup> Minyoung Yoon,<sup>f,\*</sup> and Hyosun Lee,<sup>f,\*</sup>

<sup>a</sup> Department of Chemistry, Shaheed Benazir Bhutto University, Sheringal Dir (U) 18050, Khyber Pakhtunkhwa, Islamic Republic of Pakistan

<sup>b</sup> Department of Plastics Engineering, University of Massachusetts Lowell, Lowell, MA 01851 USA

<sup>c</sup> Department of Chemistry, University of Massachusetts Lowell, Lowell, MA 01851 USA.

<sup>d</sup> BK21 FOUR KNU Creative BioResearch Group, School of Life Science, Kyungpook National University, 80 Daehakro, Bukgu, Daegu, 41566, Republic of Korea.

<sup>e</sup> Department of Environmental Chemistry, Abdul Wali Khan University Maradan, Khyber Pakhtunkhwa, Islamic Republic of Pakistan

<sup>f</sup> Department of Chemistry and Green-Nano Materials Research Center, Kyungpook National University, 80 Daehakro, Bukgu, Daegu, 41566, Republic of Korea

-----  
**\*CORRESPONDING AUTHORS**

Prof. Minyoung Yoon E-mail: [myyoon@knu.ac.kr](mailto:myyoon@knu.ac.kr)

Prof. Hyosun Lee E-mail: [hyosunlee@knu.ac.kr](mailto:hyosunlee@knu.ac.kr)

| Time (sec)                                                                                                  | 3.2768   | Comment           | TEM ligand     | Date                   | 02 Mar 2022 14:11:12 |
|-------------------------------------------------------------------------------------------------------------|----------|-------------------|----------------|------------------------|----------------------|
| C:\Users\jpr\Desktop\Sara Data\Sara NMR\TEM Ligand and Zn, Cd complexes (DMSO)\TEM ligand (DMSO)\pdata1\11r |          |                   |                |                        |                      |
| MHz                                                                                                         | 500.15   | Nucleus           | <sup>1</sup> H | Number of Transients   | 16                   |
| ms Count                                                                                                    | 32768    | Owner             | nm500          | Points Count           | 65536                |
| in                                                                                                          | 50.80    | SW(Cyclical) (Hz) | 10000.00       | Solvent                | DMSO-d6              |
| type                                                                                                        | STANDARD | Sweep Width (Hz)  | 9999.85        | Temperature (degree C) | 22.800               |
|                                                                                                             |          |                   |                | Origin                 | spect                |
|                                                                                                             |          |                   |                | Pulse Sequence         | zg30                 |
|                                                                                                             |          |                   |                | Spectrum Offset (Hz)   | 3982.9954            |

ligand (DMSO) 001 1r Vertical Scale Factor = 1

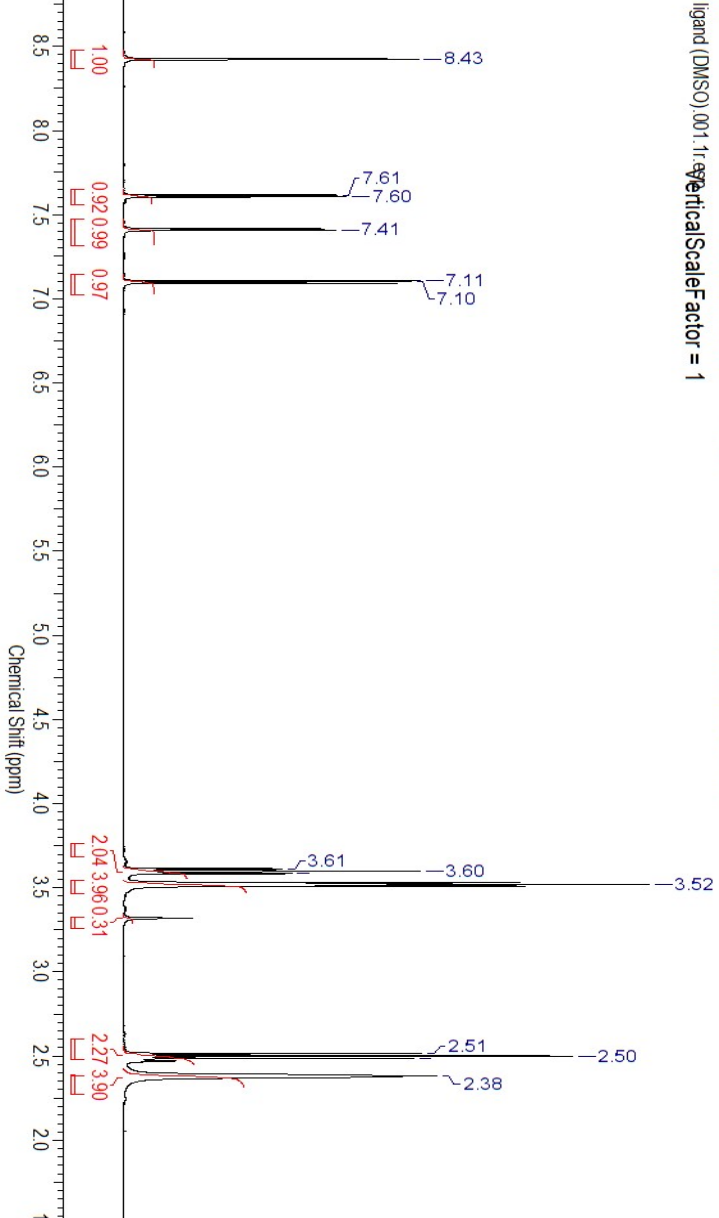

FIGURE S1. <sup>1</sup>H NMR spectrum of TEM.

This report was created by ACQ/NMR Processor Academic Edition. For more information go to [www.acdlabs.com/nmrprocl/](http://www.acdlabs.com/nmrprocl/)

6/7/2022 12:00:51 PM

| Acquisition Time (sec) | 1.1010                                         | Comment                | TEM      | Date            | 27 May 2022 22:26:24 | Date Stamp           | 27 May 2022 22:26:24 |
|------------------------|------------------------------------------------|------------------------|----------|-----------------|----------------------|----------------------|----------------------|
| File Name              | C:\Users\pro\Desktop\20-26\TEM-C NMR\PDAT\1\1\ |                        |          | Frequency (MHz) | 125.76               | Nucleus              | <sup>13</sup> C      |
| Origin                 | spect                                          | Original Points Count  | 32768    | Owner           | nm-500               | Points Count         | 32768                |
| Receiver Gain          | 2060.00                                        | SW (cyclical) (Hz)     | 29761.90 | Solvent         | DMSO-d6              | Spectrum Offset (Hz) | 12576.8057           |
| Preamp Width (Hz)      | 29761.00                                       | Temperature (degree C) | 25.300   |                 |                      | Pulse Sequence       | zpgq30               |
|                        |                                                |                        |          |                 |                      | Spectrum Type        | STANDARD             |

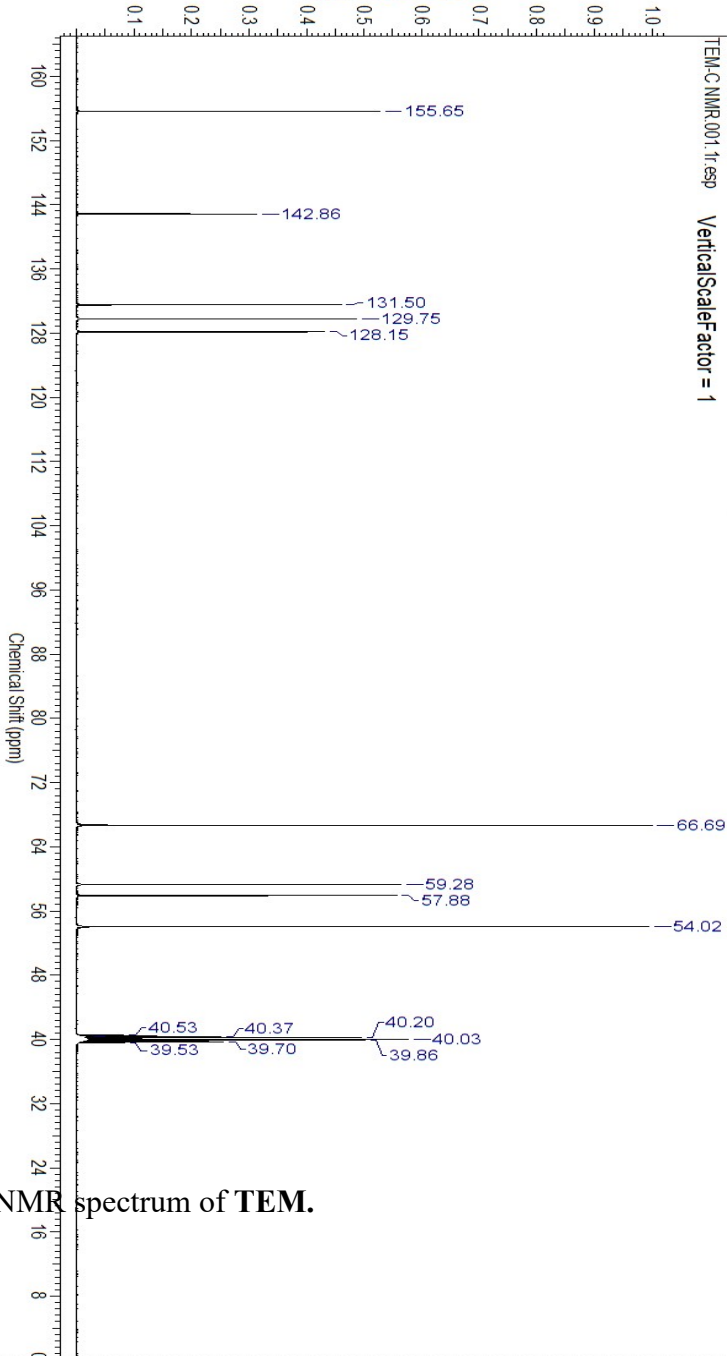

FIGURE S2. <sup>13</sup>C NMR spectrum of TEM.

|                        |                                                                                                      |                   |                |                        |                      |
|------------------------|------------------------------------------------------------------------------------------------------|-------------------|----------------|------------------------|----------------------|
| Acquisition Time (sec) | 3.2768                                                                                               | Comment           | TEM_Zn         | Date                   | 02 Mar 2022 14:15:28 |
| Date Stamp             | 02 Mar 2022 14:15:28                                                                                 |                   |                |                        |                      |
| File Name              | C:\Users\pro\Desktop\Sara Data\Sara NMR\TEM Ligand and Zn_Cd complexes (DMSO)\TEM_Zn (DMSO)\pdata11r |                   |                |                        |                      |
| Frequency (MHz)        | 500.15                                                                                               | Nucleus           | <sup>1</sup> H | Number of Transients   | 16                   |
| Original Points Count  | 32768                                                                                                | Owner             | nm500          | Points Count           | 65536                |
| Receiver Gain          | 287.00                                                                                               | SW(cyclical) (Hz) | 10000.00       | Solvent                | DMSO-d6              |
| Spectrum Type          | STANDARD                                                                                             | Sweep Width (Hz)  | 9999.85        | Temperature (degree C) | 22.800               |

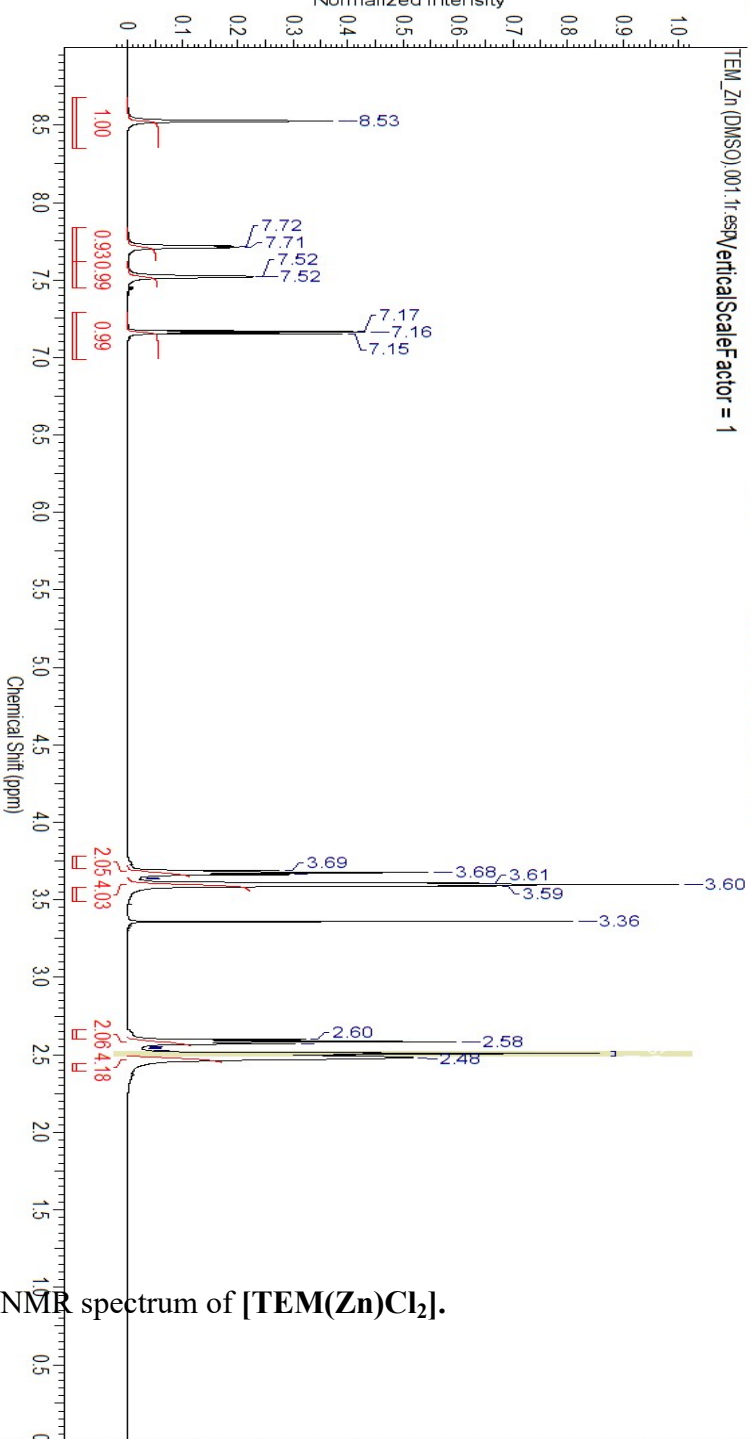

FIGURE S3. <sup>1</sup>H NMR spectrum of [TEM(Zn)Cl<sub>2</sub>].

|                        |                                                                                                          |                  |                |                        |                      |
|------------------------|----------------------------------------------------------------------------------------------------------|------------------|----------------|------------------------|----------------------|
| Acquisition Time (sec) | 3.2768                                                                                                   | Comment          | TEM-Cd         | Date                   | 02 Mar 2022 14:21:52 |
| File Stamp             | 02 Mar 2022 14:21:52                                                                                     |                  |                |                        |                      |
| Name                   | C:\Users\p\p\Desktop\Saira Data\Saira NMR\TEM Ligand and Zn, Cd complexes (DMSO)\TEM_Cd (DMSO)\pdata\11r |                  |                |                        |                      |
| Frequency (MHz)        | 500.15                                                                                                   | Nucleus          | <sup>1</sup> H | Number of Transients   | 16                   |
| Original Points Count  | 32768                                                                                                    | Owner            | nm500          | Points Count           | 65536                |
| Receiver Gain          | 287.00                                                                                                   | SW (cyclic) (Hz) | 10000.00       | Solvent                | DMSO-d6              |
| Spectrum Type          | STANDARD                                                                                                 | Sweep Width (Hz) | 9999.85        | Temperature (degree C) | 22.800               |
|                        |                                                                                                          |                  |                | Origin                 | spect                |
|                        |                                                                                                          |                  |                | Pulse Sequence         | zg30                 |
|                        |                                                                                                          |                  |                | Spectrum Offset (Hz)   | 4001.1992            |

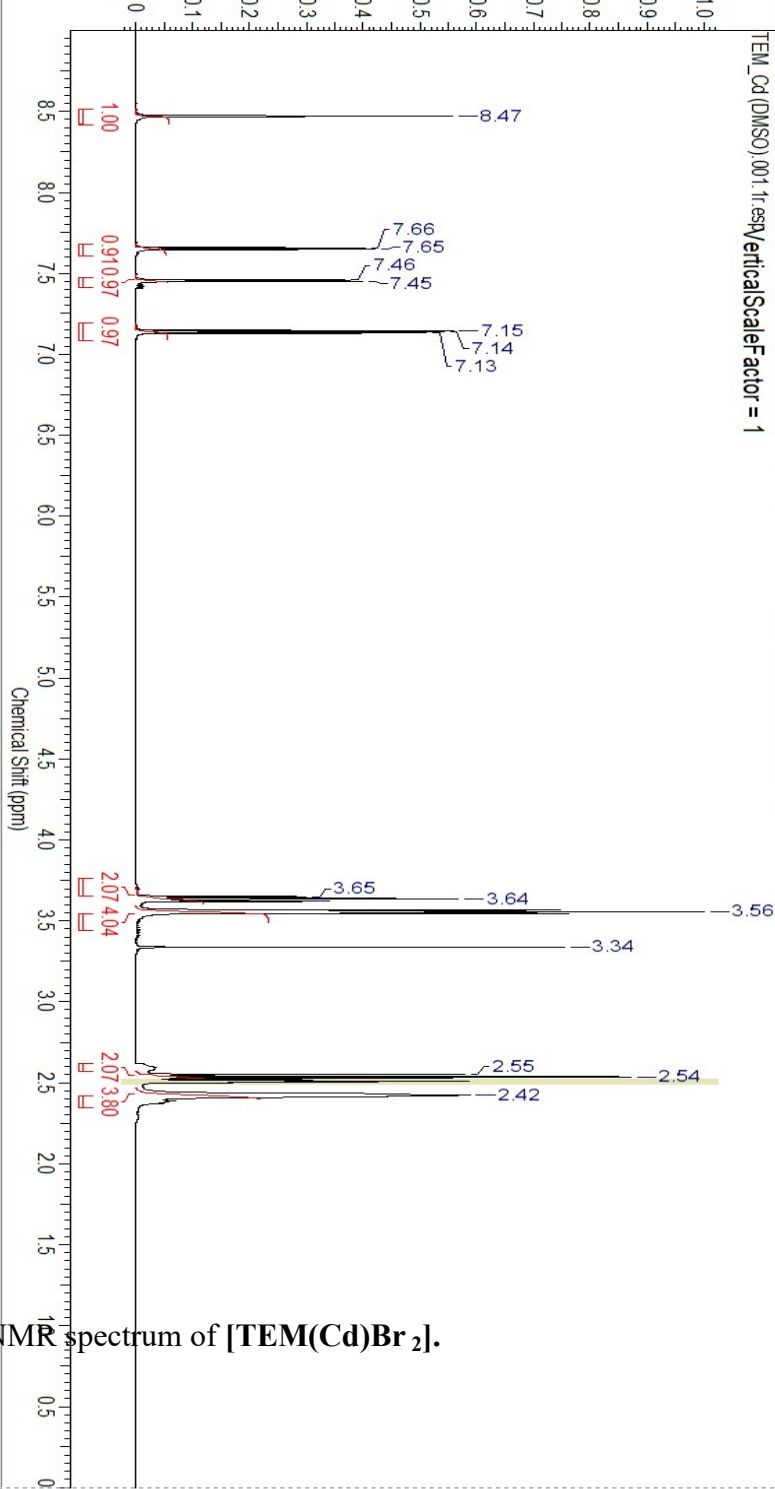

FIGURE S4. <sup>1</sup>H NMR spectrum of [TEM(Cd)Br<sub>2</sub>].

|                 |                                                                                                                         |                    |                 |                        |                      |
|-----------------|-------------------------------------------------------------------------------------------------------------------------|--------------------|-----------------|------------------------|----------------------|
| Sample Name     | 18 Jul 2022 17:14:56                                                                                                    | Comment            | TEM-Zn          | Date                   | 18 Jul 2022 17:14:56 |
| File Path       | C:\Users\pro\Desktop\Saira Data\Saira NMR\TEM Ligand and Zn_Cd complexes (DMSO)\TEM-Zn (DMSO4) C NMR Corrected\PDAT\11r |                    |                 |                        |                      |
| Frequency (MHz) | 125.76                                                                                                                  | Nucleus            | <sup>13</sup> C | Number of Transients   | 2048                 |
| Points Count    | 32768                                                                                                                   | Owner              | nm500           | Points Count           | 32768                |
| Power Gain      | 2050.00                                                                                                                 | SW (cyclical) (Hz) | 29761.90        | Solvent                | DMSO-d6              |
| Scan Type       | STANDARD                                                                                                                | Sweep Width (Hz)   | 29761.00        | Temperature (degree C) | 26.400               |

VerticalScaleFactor = 1

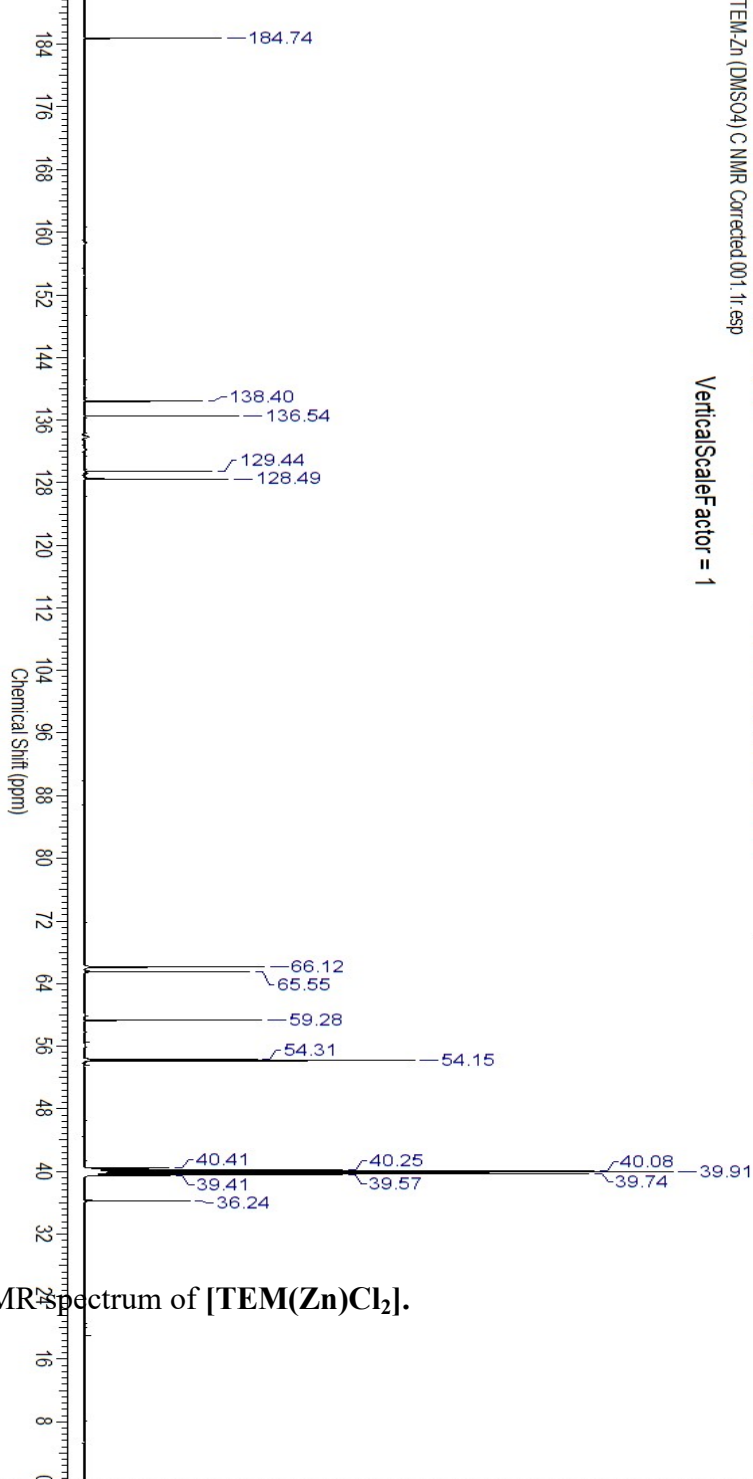

FIGURE S5. <sup>13</sup>C NMR spectrum of [TEM(Zn)Cl<sub>2</sub>].

|                        |                      |                      |                 |                        |                                                      |
|------------------------|----------------------|----------------------|-----------------|------------------------|------------------------------------------------------|
| Acquisition Time (sec) | 1.1010               | Comment              | TEM-Cd          | Date                   | 28 May 2022 02:10:24                                 |
| Date Stamp             | 28 May 2022 02:10:24 | Nucleus              | <sup>13</sup> C | File Name              | C:\Users\jpro\Desktop\20-26\TEM-Cd C NMR\PPDA\TA\11r |
| Frequency (MHz)        | 125.76               | Points Count         | 32768           | Number of Transients   | 2048                                                 |
| Owner                  | nm500                | Spectrum Offset (Hz) | 125768057       | Pulse Sequence         | zgpg30                                               |
| Solvent                | DMSO-d6              | Spectrum Type        | STANDARD        | Receiver Gain          | 2050.00                                              |
|                        |                      |                      |                 | Sweep Width (Hz)       | 29761.00                                             |
|                        |                      |                      |                 | Original Points Count  | 32768                                                |
|                        |                      |                      |                 | SW (cycles) (Hz)       | 29761.90                                             |
|                        |                      |                      |                 | Temperature (degree C) | 25.400                                               |

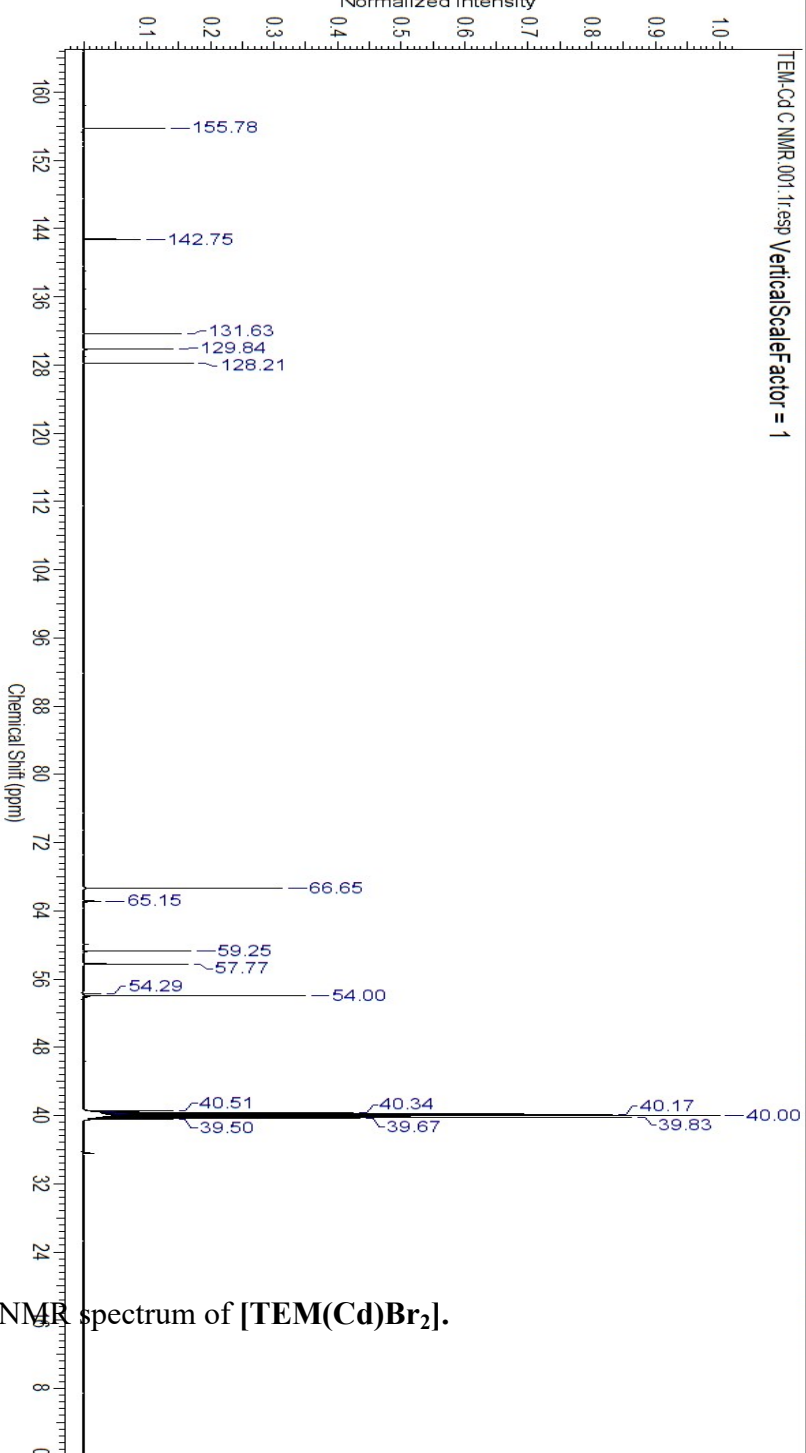

FIGURE S6. <sup>13</sup>C NMR spectrum of [TEM(Cd)Br<sub>2</sub>].

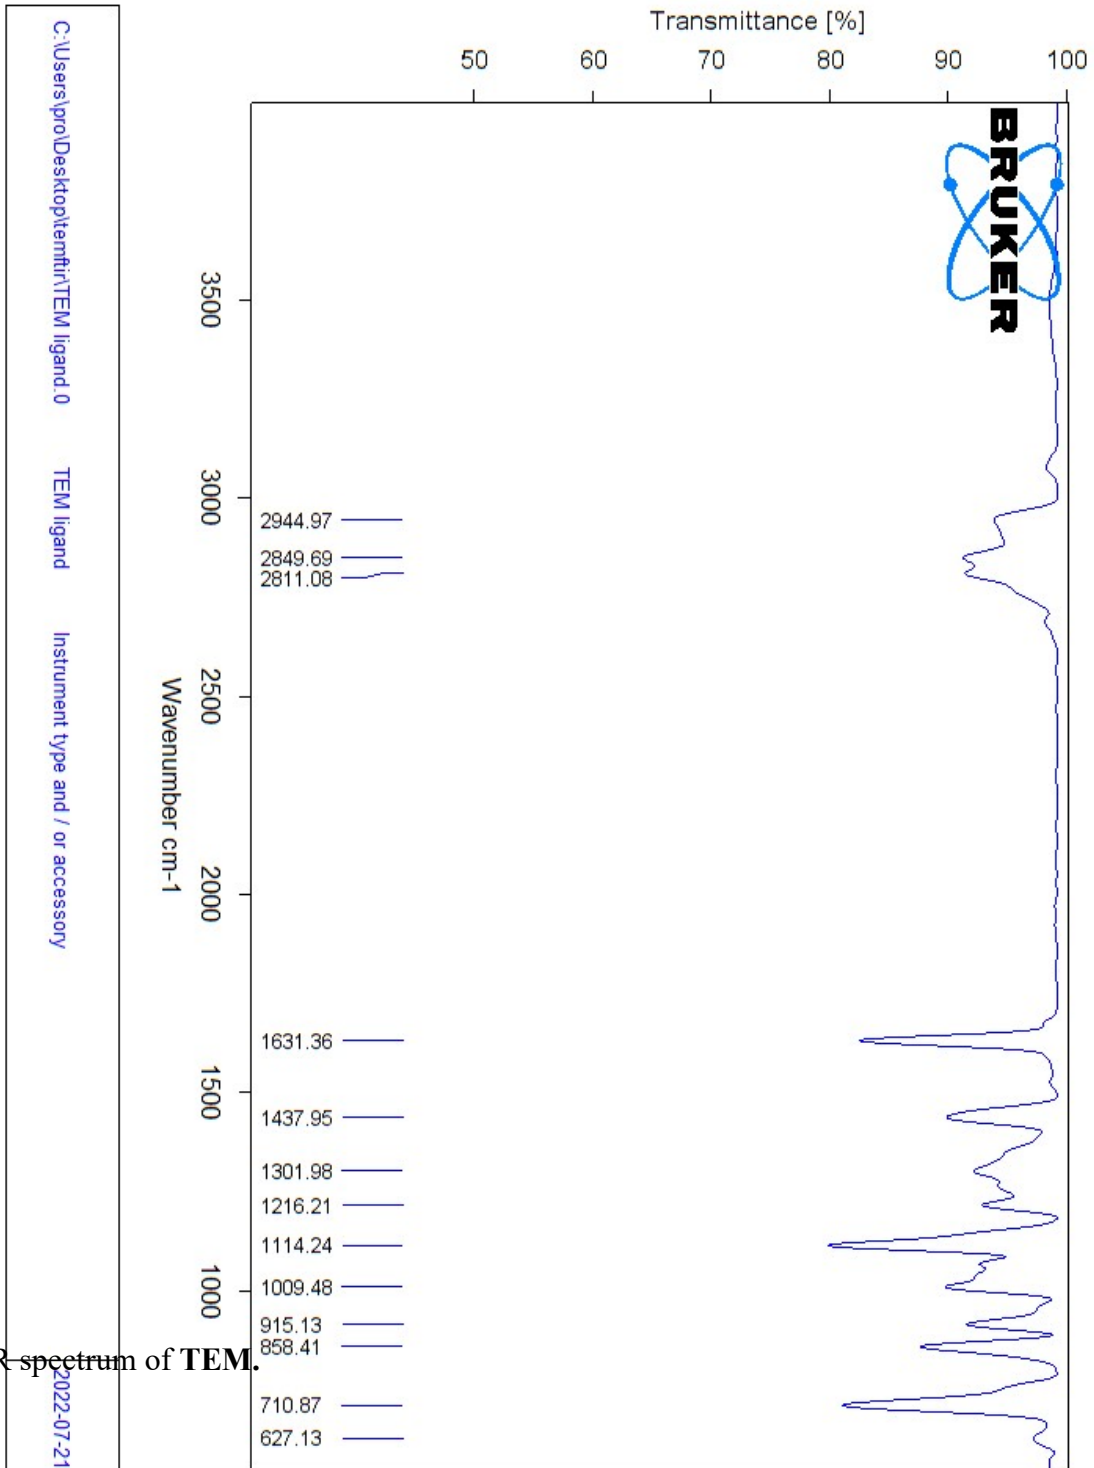

FIGURE S7. FTIR-spectrum of TEM.



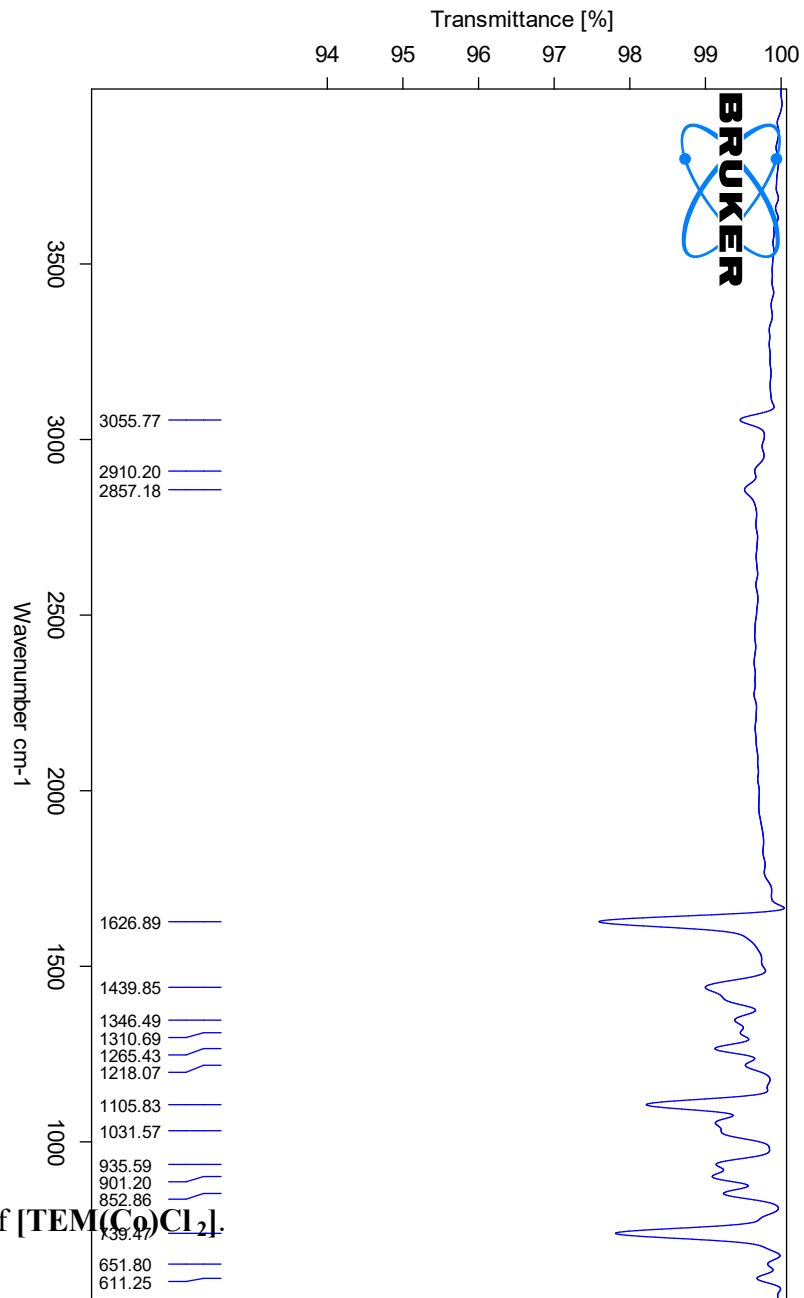

FIGURE S8. FTIR spectrum of [TEM(CO)Cl<sub>2</sub>].

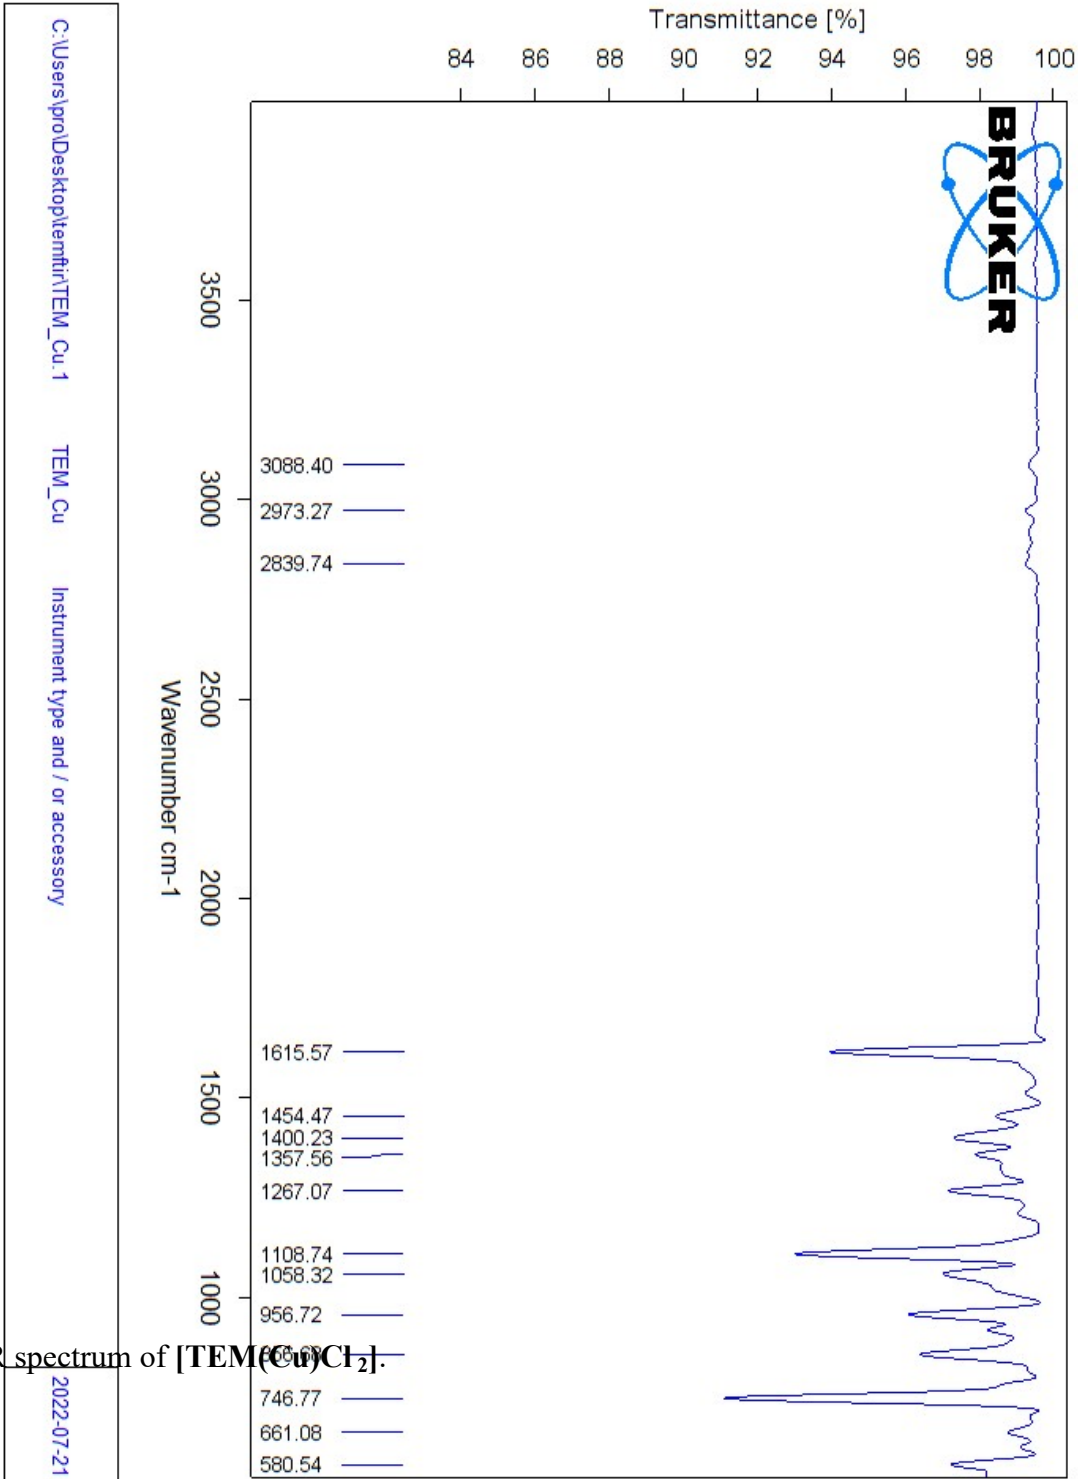

FIGURE S9. FTIR spectrum of [TEM(Cu)Cl<sub>2</sub>].

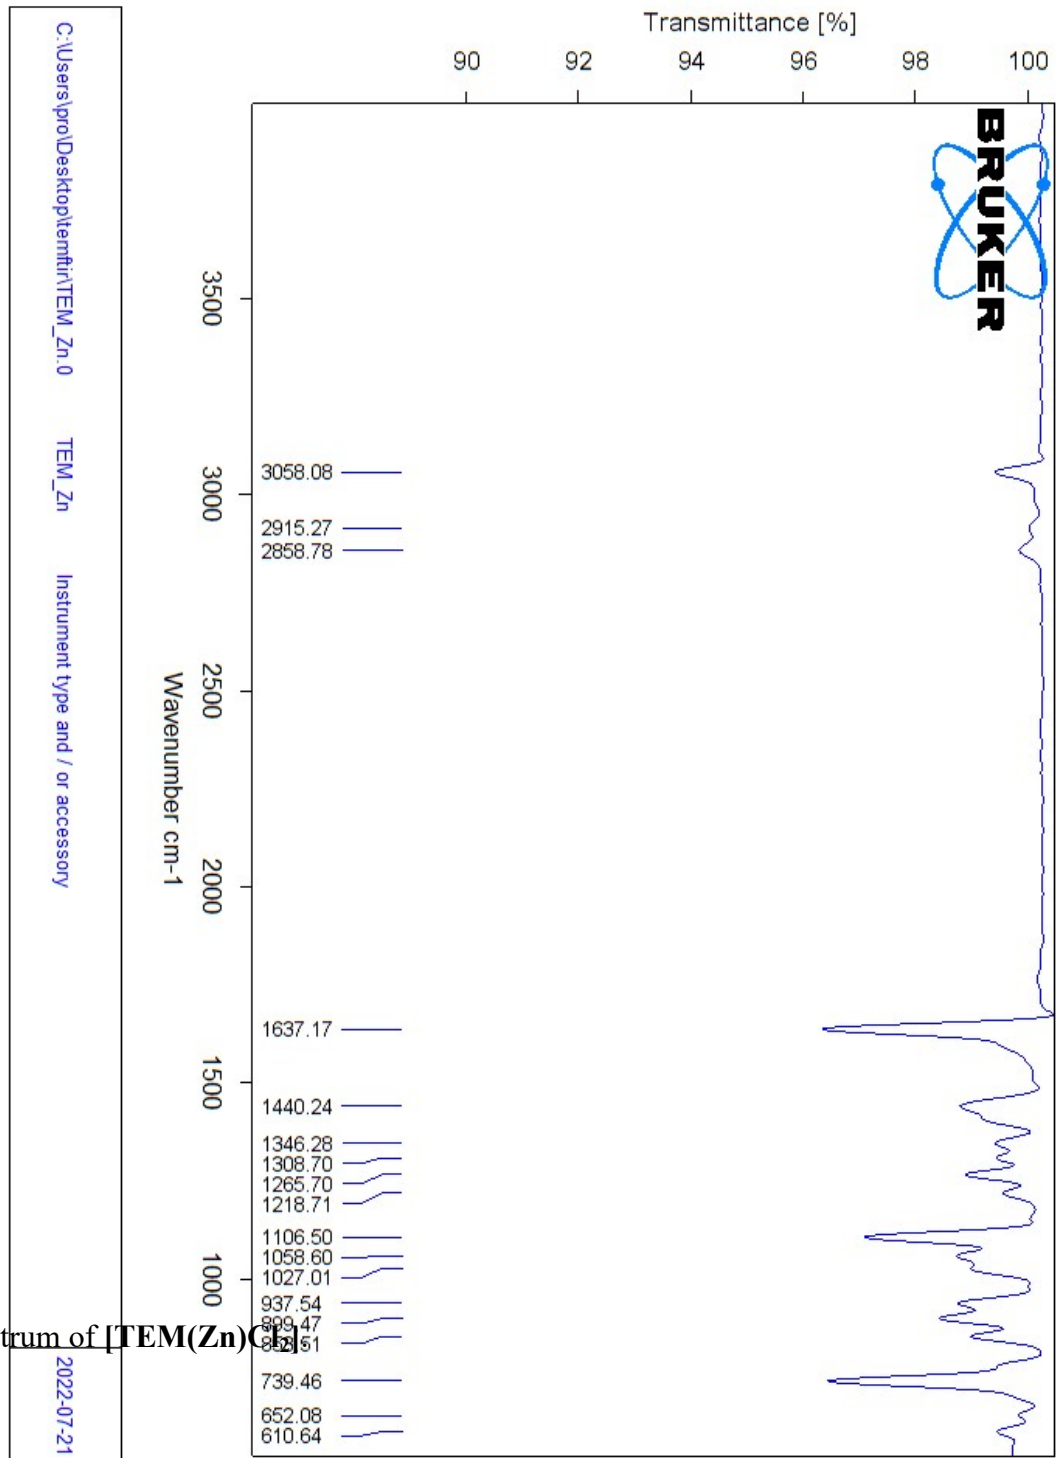

FIGURE S10. FTIR spectrum of [TEM(Zn)Cl]

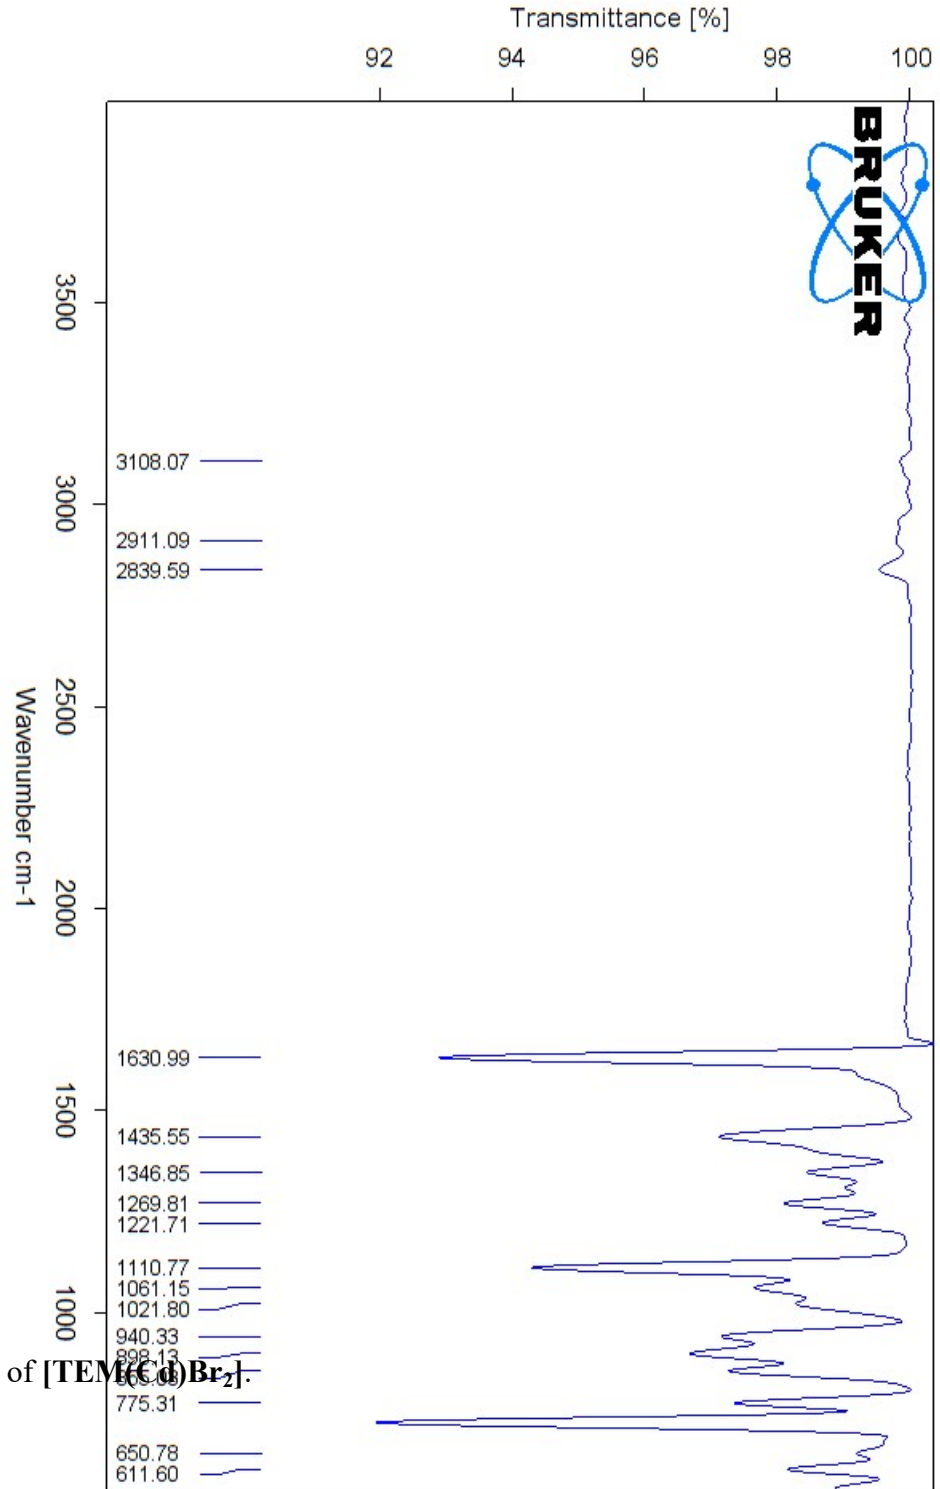

FIGURE S11. FTIR spectrum of [TEM(Cd)Br<sub>2</sub>].

EagerSmart Summarize Results

Date : 2022-03-10 at 10:01:48

Method Name : NCHS

Method Filename : EA-C\_20220308.mth

| Group No : 2 | Element %   |             |             |         |
|--------------|-------------|-------------|-------------|---------|
| Sample Name  | Nitrogen    | Carbon      | Hydrogen    | Sulphur |
| TEM-Cd       | 6.04276228  | 26.9035244  | 3.344803095 | 0       |
| TEM-Cd       | 6.038705349 | 26.88916397 | 3.335220575 | 0       |

2 Sample(s) in Group No : 2

| Component Name | Average     |
|----------------|-------------|
| Nitrogen       | 6.040733814 |
| Carbon         | 26.89634418 |
| Hydrogen       | 3.340011835 |
| Sulphur        | 0           |

| Group No : 5 | Element %   |             |             |         |
|--------------|-------------|-------------|-------------|---------|
| Sample Name  | Nitrogen    | Carbon      | Hydrogen    | Sulphur |
| TEM-Zn       | 7.812420845 | 36.42247009 | 4.451468468 | 0       |
| TEM-Zn       | 7.8266325   | 36.56750488 | 4.446727276 | 0       |

2 Sample(s) in Group No : 5

| Component Name | Average     |
|----------------|-------------|
| Nitrogen       | 7.819526672 |
| Carbon         | 36.49498749 |
| Hydrogen       | 4.449097872 |
| Sulphur        | 0           |

| Group No : 2 | Element %   |             |             |         |
|--------------|-------------|-------------|-------------|---------|
| Sample Name  | Nitrogen    | Carbon      | Hydrogen    | Sulphur |
| TEM-Cu       | 8.198022842 | 36.31325531 | 4.618414402 | 0       |
| TEM-Cu       | 8.262527466 | 36.41964722 | 4.642665863 | 0       |

2 Sample(s) in Group No : 2

| Component Name | Average     |
|----------------|-------------|
| Nitrogen       | 8.230275154 |
| Carbon         | 36.36645126 |
| Hydrogen       | 4.630540133 |
| Sulphur        | 0           |

| Group No : 5  | Element %   |             |             |          |
|---------------|-------------|-------------|-------------|----------|
| Sample Name   | Nitrogen%   | Carbon%     | Hydrogen%   | Sulphur% |
| TEM-Co (EtOH) | 7.748516083 | 36.93906403 | 4.580291271 | 0        |
| TEM-Co (EtOH) | 7.747725964 | 36.99332428 | 4.601635456 | 0        |

2 Sample(s) in Group No : 5

| Component Name | Average     |
|----------------|-------------|
| Nitrogen%      | 7.748121023 |
| Carbon%        | 36.96619415 |
| Hydrogen%      | 4.590963364 |
| Sulphur%       | 0           |

FIGURE S12. Summary of elemental analysis of synthesized complexes.

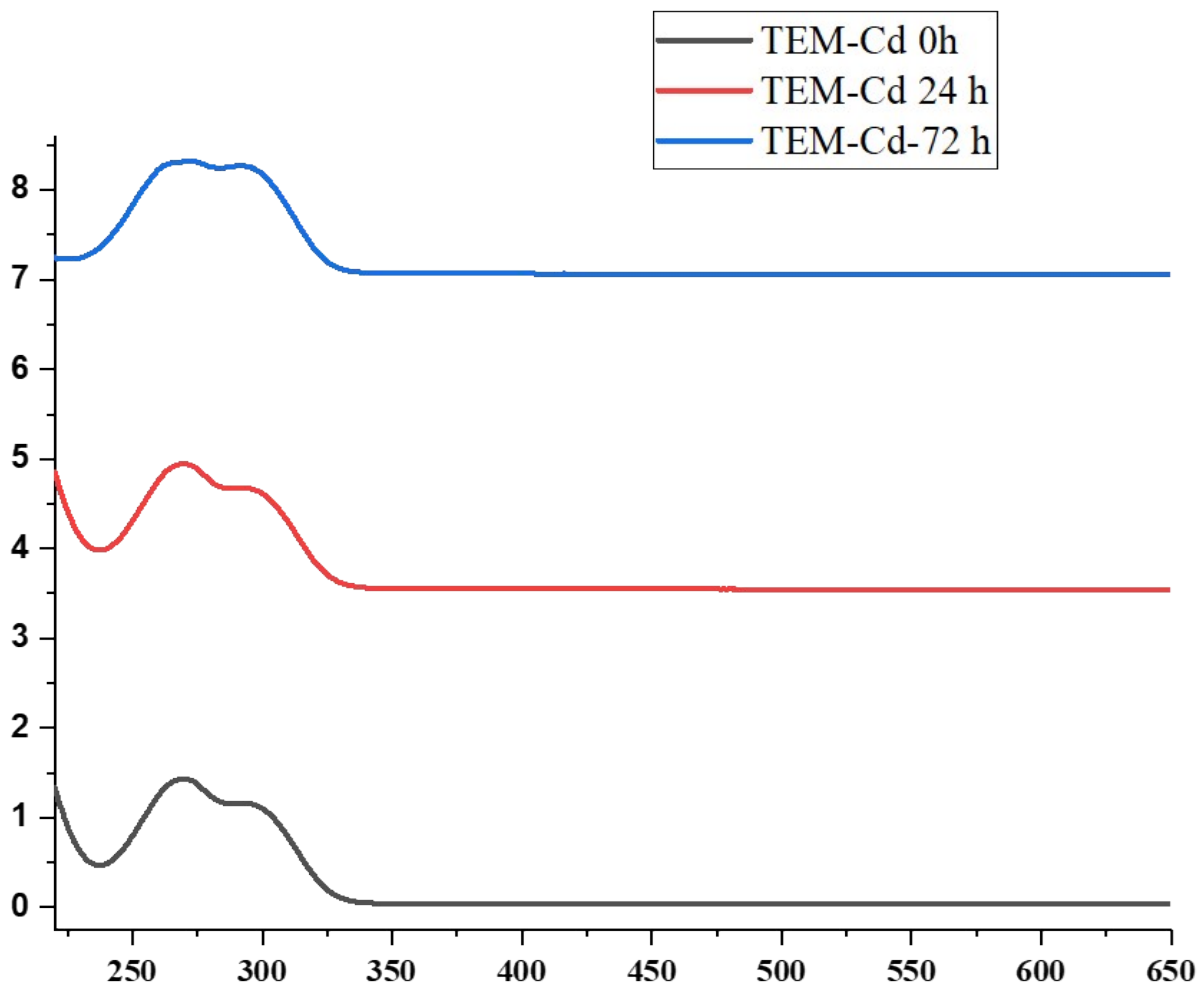

**FIGURE S13.** Time stability of complex [TEM(Cd)Br<sub>2</sub>] followed by UV-Vis spectrophotometry at room temperature in acetonitrile.

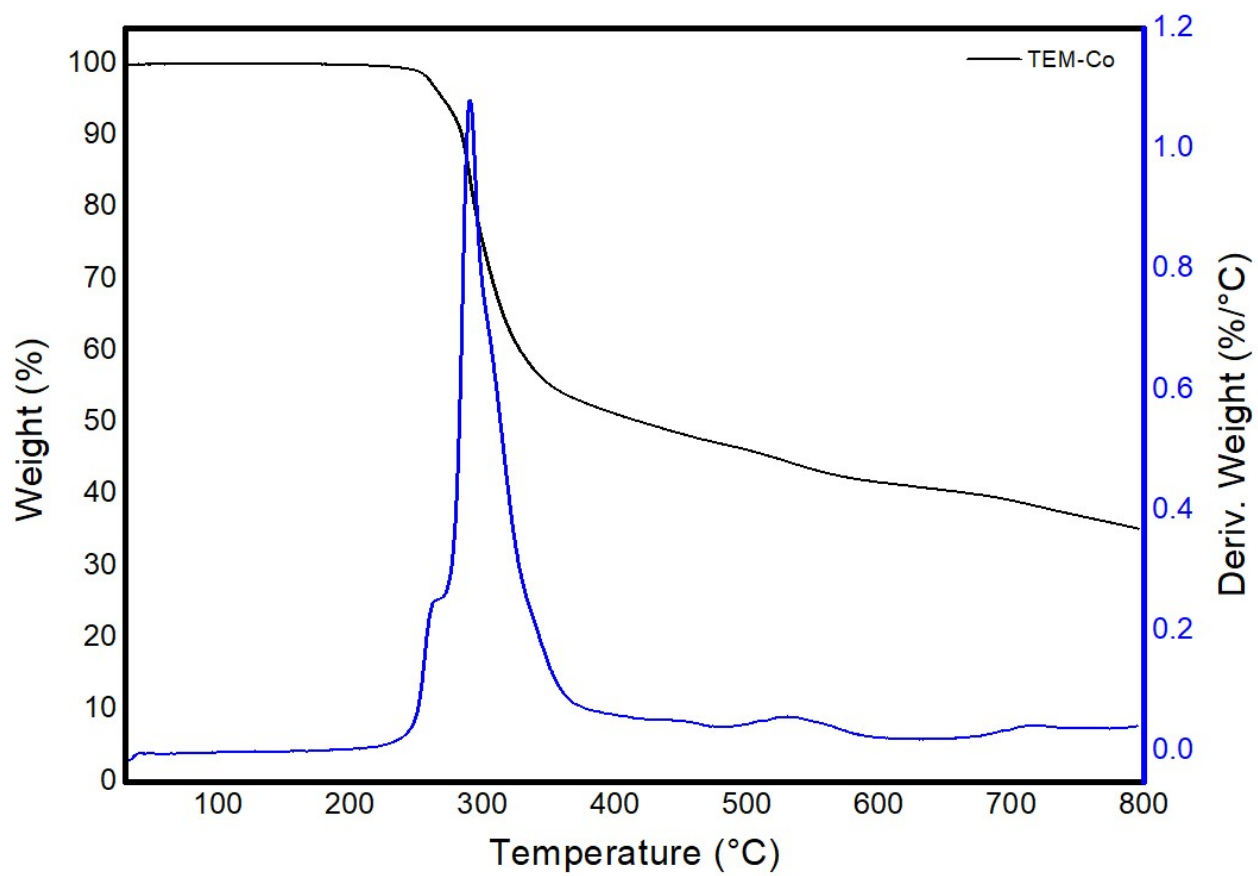

**FIGURE S14.** TGA thermogram of [TEM(Co)Cl<sub>2</sub>].

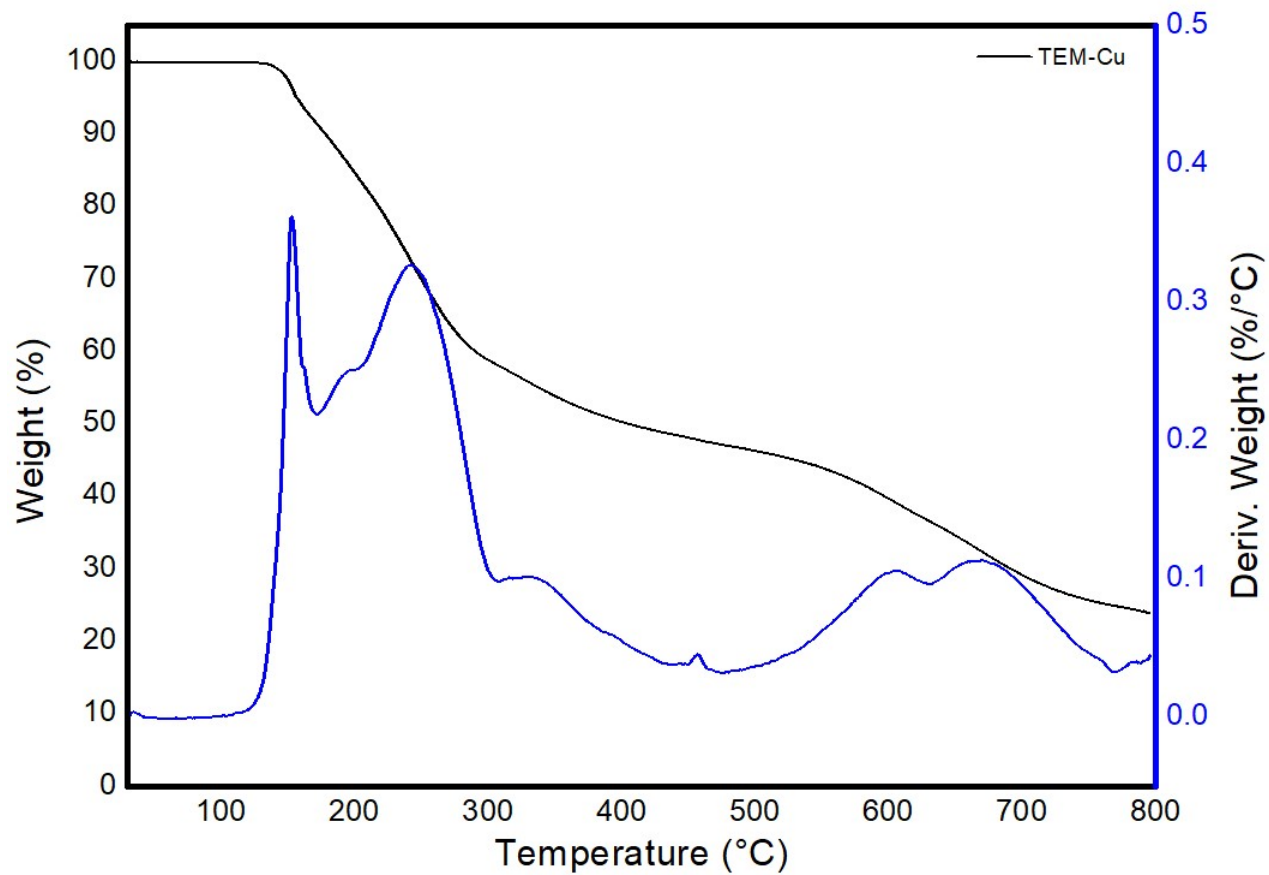

**FIGURE S15.** TGA thermogram of [TEM(Cu)Cl<sub>2</sub>].



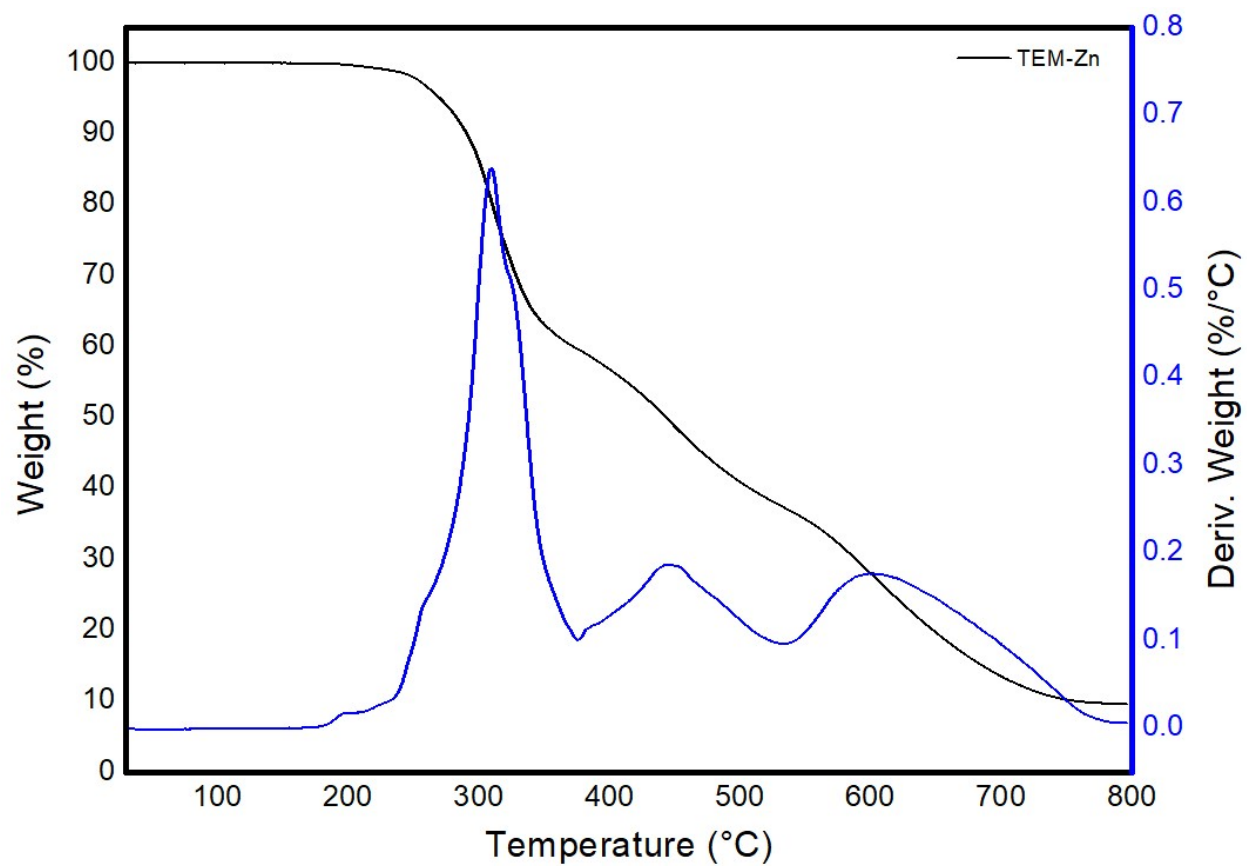

**FIGURE S16.** TGA thermogram of [TEM(Zn)Cl<sub>2</sub>].

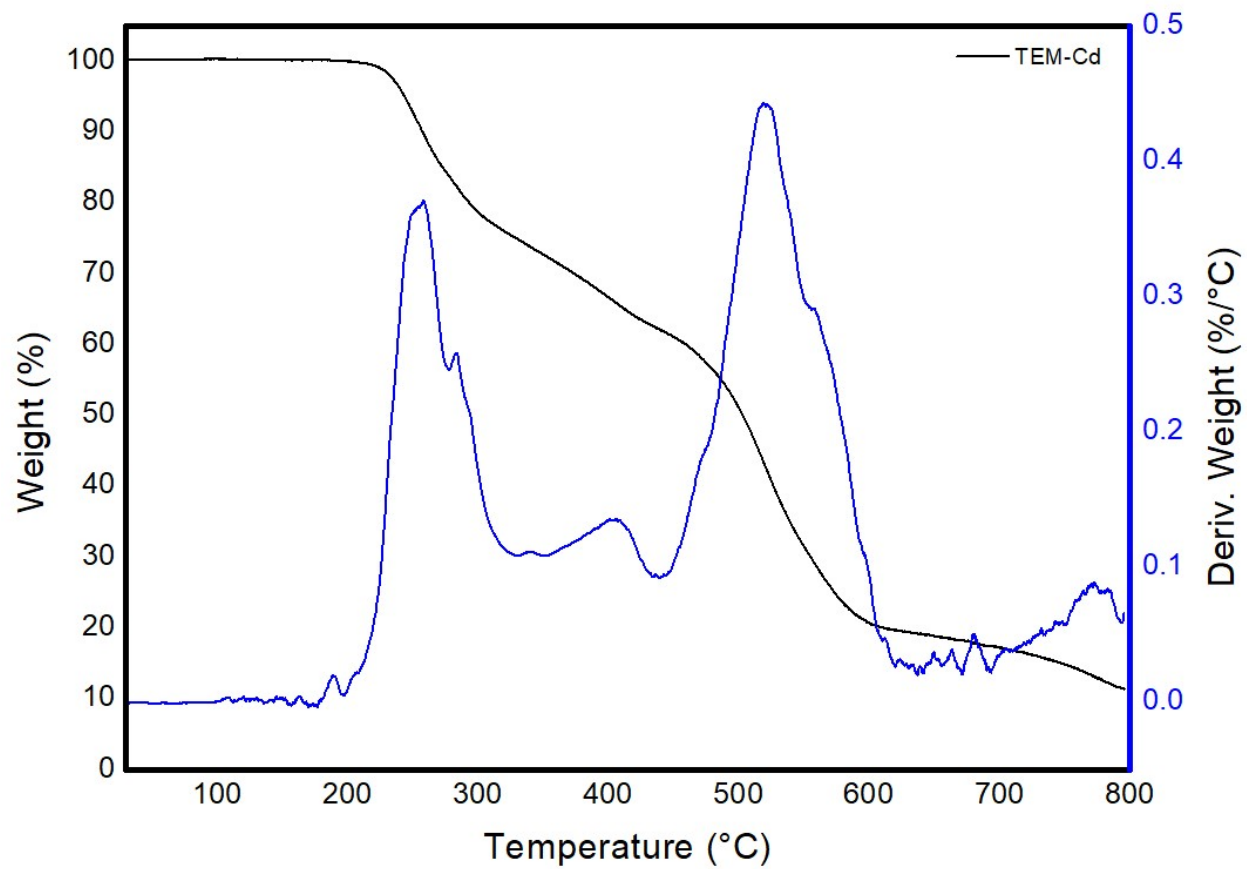

**FIGURE S17.** TGA thermogram of [TEM(Cd)Br<sub>2</sub>].

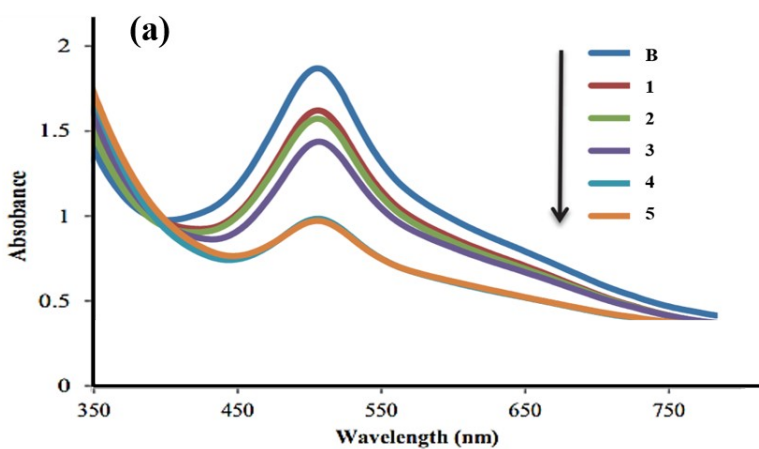

(b)

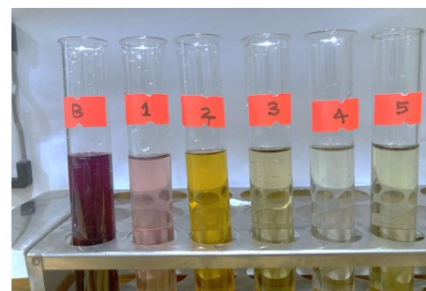

**FIGURE S18.** (a) Representative absorption spectra of DPPH in the presence and absence of [TEM(Cd)Br<sub>2</sub>]. (b) The arrow represents the decrease in absorption with increasing concentration; the change in the solution colour is also shown.

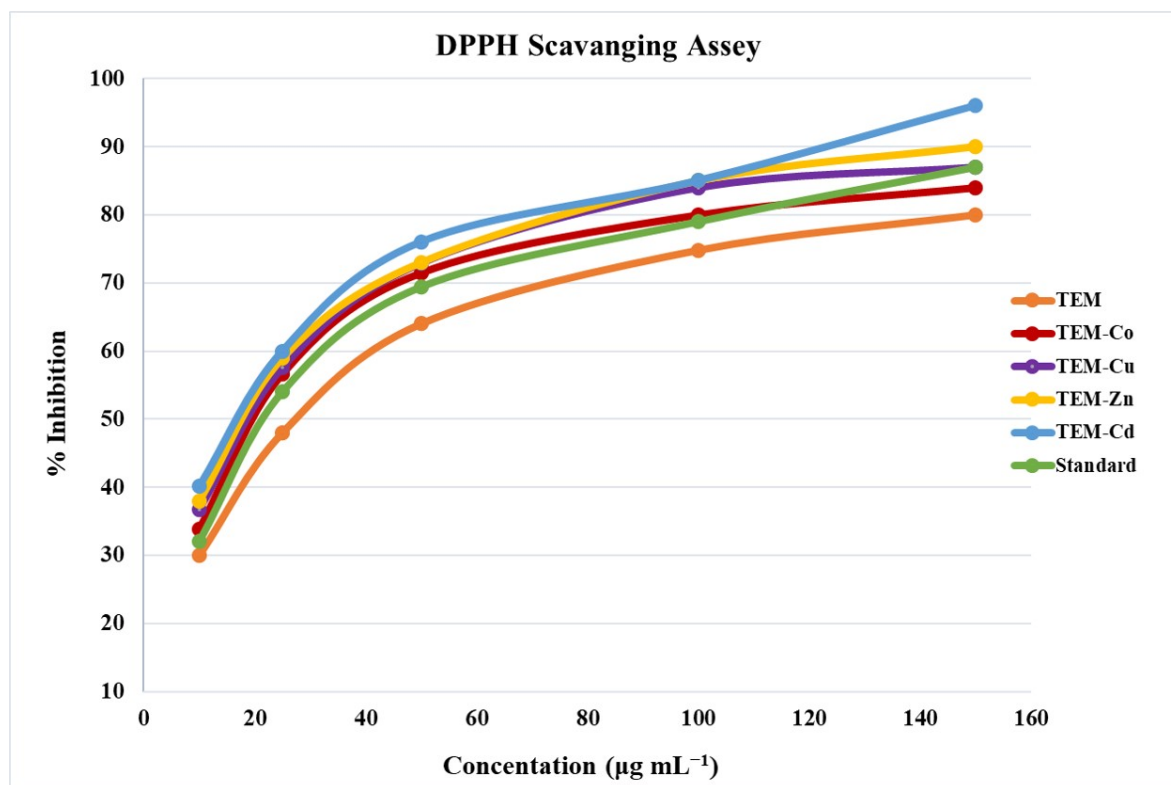

**FIGURE S19.** Antioxidant activity of TEM and corresponding M(II) complexes.

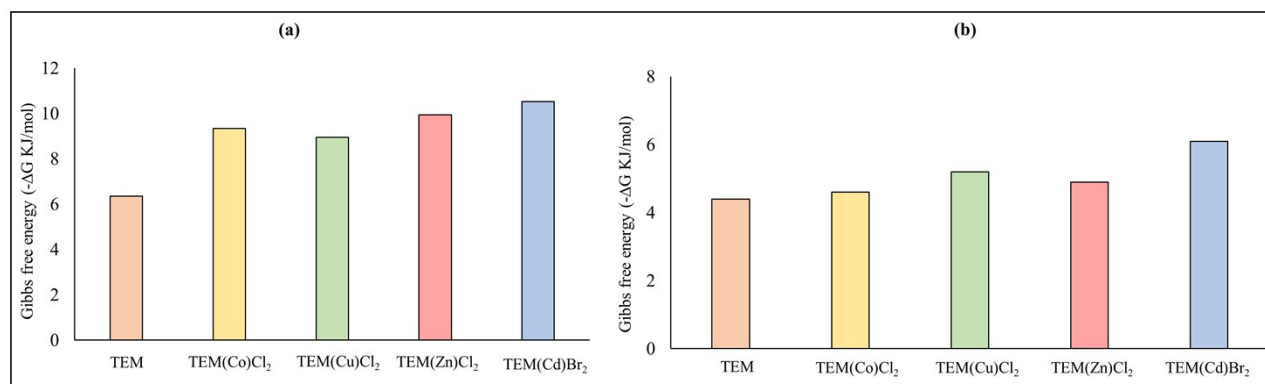

**FIGURE S20.** Calculated Gibbs free energy of TEM and their metal complexes with **(a)** 2JK6 and **(b)** 2UBP from molecular docking results.

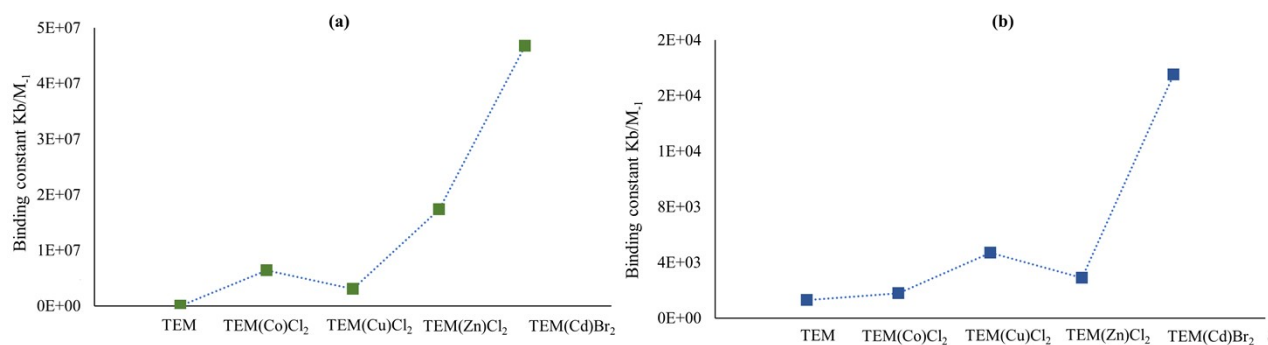

**FIGURE S21.** Calculated binding constant of **TEM** and their metal complexes with (a) 2JK6 and (b) 2UBP from molecular docking results.

**TABLE S1.** Structure refinement and crystallographic data of [TEM(M)X<sub>2</sub>], (M = Co, Zn; X = Cl; M = Cd, X = Br) complexes.

|                          | [TEM(Co)Cl <sub>2</sub> ]                                           | [TEM(Zn)Cl <sub>2</sub> ]                                           | [TEM(Cd)Br <sub>2</sub> ].CH <sub>2</sub> Cl <sub>2</sub>                                            |
|--------------------------|---------------------------------------------------------------------|---------------------------------------------------------------------|------------------------------------------------------------------------------------------------------|
| Empirical formula        | C <sub>11</sub> H <sub>16</sub> Cl <sub>2</sub> CoN <sub>2</sub> OS | C <sub>11</sub> H <sub>16</sub> Cl <sub>2</sub> N <sub>2</sub> OSZn | C <sub>11</sub> H <sub>16</sub> Br <sub>2</sub> CdN <sub>2</sub> OS. CH <sub>2</sub> Cl <sub>2</sub> |
| Formula weight           | 354.14                                                              | 360.59                                                              | 581.46                                                                                               |
| Temperature (K)          | 293(2)                                                              | 293(2)                                                              | 293(2)                                                                                               |
| Wavelength (Å)           | 0.71073                                                             | 0.71073                                                             | 0.71073                                                                                              |
| Crystal system           | Triclinic                                                           | Triclinic                                                           | Monoclinic                                                                                           |
| Space group              | P-1                                                                 | P-1                                                                 | P2 <sub>1</sub> /c                                                                                   |
| Unit cell dimensions     |                                                                     |                                                                     |                                                                                                      |
| <i>a</i> (Å)             | 8.4030(4)                                                           | 8.4460(4)                                                           | 8.6766(3)                                                                                            |
| <i>b</i> (Å)             | 9.2421(3)                                                           | 9.2335(4)                                                           | 15.4523(6)                                                                                           |
| <i>c</i> (Å)             | 9.9135(6)                                                           | 9.9636(5)                                                           | 14.4470(4)                                                                                           |
| <i>α</i> (°)             | 90.781(4)                                                           | 90.682(4)                                                           | 90                                                                                                   |
| <i>β</i> (°)             | 108.380(5)                                                          | 108.394(4)°                                                         | 97.237(3)                                                                                            |
| <i>γ</i> (°)             | 90.619(3)                                                           | 90.304(4)°                                                          | 90                                                                                                   |
| Volume (Å <sup>3</sup> ) | 730.46(6)                                                           | 737.24(6)                                                           | 1921.53(11)                                                                                          |

|                                            |                                                             |                                                             |                                                             |
|--------------------------------------------|-------------------------------------------------------------|-------------------------------------------------------------|-------------------------------------------------------------|
| <i>Z</i>                                   | 2                                                           | 2                                                           | 4                                                           |
| Density (calculated) (Mg/m <sup>3</sup> )  | 1.610                                                       | 1.624                                                       | 2.010                                                       |
| Absorption coefficient (mm <sup>-1</sup> ) | 1.659                                                       | 2.158                                                       | 5.668                                                       |
| <i>F</i> (000)                             | 362                                                         | 368                                                         | 1120                                                        |
| Crystal size (mm <sup>3</sup> )            | 0.143 × 0.121 × 0.089                                       | 0.125 × 0.058 × 0.010                                       | 0.125 × 0.105 × 0.075                                       |
| θ range for data collection (°)            | 2.165 to 30.661                                             | 2.154 to 26.366                                             | 1.938 to 26.371                                             |
| Index ranges                               | -11≤ <i>h</i> ≤11, -13≤ <i>k</i> ≤13, -<br>13≤ <i>l</i> ≤13 | -10≤ <i>h</i> ≤10, -11≤ <i>k</i> ≤11, -<br>12≤ <i>l</i> ≤12 | -10≤ <i>h</i> ≤10, -19≤ <i>k</i> ≤19, -<br>17≤ <i>l</i> ≤18 |
| Reflections collected                      | 12637                                                       | 9294                                                        | 14902                                                       |
| Independent reflections                    | 4212 [R(int) = 0.0440]                                      | 2981 [R(int) = 0.0318]                                      | 3927 [R(int) = 0.0362]                                      |
| Completeness to θ = 25.242°                | 99.4                                                        | 99.2                                                        | 100.0                                                       |
| Absorption correction                      | Semi-empirical from<br>equivalents                          | Semi-empirical from<br>equivalents                          | Semi-empirical from<br>equivalents                          |
| Refinement method                          | Full-matrix least-squares on <i>F</i> <sup>2</sup>          | Full-matrix least-squares on <i>F</i> <sup>2</sup>          | Full-matrix least-squares on <i>F</i> <sup>2</sup>          |
| Data/restraints/parameters                 | 4212 / 0 / 163                                              | 2987 / 0 / 163                                              | 3927 / 0 / 190                                              |
| Goodness-of-fit on <i>F</i> <sup>2</sup>   | 1.097                                                       | 1.073                                                       | 1.122                                                       |



|                                                           |                               |                               |                               |
|-----------------------------------------------------------|-------------------------------|-------------------------------|-------------------------------|
| Final $R$ indices [ $I > 2\sigma(I)$ ]                    | $R_1 = 0.0452, wR_2 = 0.1223$ | $R_1 = 0.0356, wR_2 = 0.0873$ | $R_1 = 0.0395, wR_2 = 0.0938$ |
| $R$ indices (all data)                                    | $R_1 = 0.0667, wR_2 = 0.1404$ | $R_1 = 0.0463, wR_2 = 0.0916$ | $R_1 = 0.0549, wR_2 = 0.1064$ |
| Largest diff. peak and hole ( $e \cdot \text{\AA}^{-3}$ ) | 0.657 and -0.979              | 0.442 and -0.549              | 0.581 and -0.966              |

**TABLE S2.** Atomic coordinates (  $\times 10^4$  ) and equivalent isotropic displacement parameters (  $\text{\AA}^2 \times 10^3$  ) for [TEM(Co)Cl<sub>2</sub>]. U(eq) is defined as one third of the trace of the orthogonalized  $U_{ij}$  tensor.

|       | x       | y       | z       | U(eq) |
|-------|---------|---------|---------|-------|
| Co(1) | 5047(1) | 3420(1) | 2592(1) | 34(1) |
| Cl(1) | 6096(1) | 3099(1) | 4921(1) | 53(1) |
| S(1)  | 8139(1) | 5958(1) | 3330(1) | 66(1) |
| O(1)  | 2101(3) | -355(2) | 1654(3) | 62(1) |
| N(1)  | 4137(3) | 5413(2) | 1945(2) | 37(1) |
| C(1)  | 4768(3) | 6693(3) | 2064(3) | 40(1) |
| Cl(2) | 6627(1) | 2447(1) | 1400(1) | 58(1) |
| N(2)  | 2490(3) | 2742(2) | 2065(2) | 35(1) |
| C(2)  | 6502(3) | 7115(3) | 2648(3) | 43(1) |
| C(3)  | 7084(4) | 8543(3) | 2773(3) | 52(1) |
| C(4)  | 8781(5) | 8661(4) | 3393(4) | 73(1) |
| C(5)  | 9526(4) | 7360(5) | 3750(4) | 74(1) |
| C(6)  | 2293(3) | 5297(3) | 1331(3) | 45(1) |
| C(7)  | 1670(3) | 4146(3) | 2124(3) | 42(1) |
| C(8)  | 1758(4) | 2043(3) | 635(3)  | 45(1) |
| C(9)  | 2435(4) | 533(3)  | 606(3)  | 55(1) |
| C(10) | 2125(4) | 1760(3) | 3114(3) | 45(1) |
| C(11) | 2825(4) | 288(3)  | 3026(4) | 57(1) |

**TABLE S3.** Atomic coordinates (  $\times 10^4$  ) and equivalent isotropic displacement parameters (  $\text{\AA}^2 \times 10^3$  ) for [TEM(Zn)Cl<sub>2</sub>]. U(eq) is defined as one third of the trace of the orthogonalized U<sub>ij</sub> tensor.

|       | x       | y        | z       | U(eq) |
|-------|---------|----------|---------|-------|
| Zn(1) | 4941(1) | 6611(1)  | 7403(1) | 34(1) |
| Cl(1) | 3928(1) | 6911(1)  | 5086(1) | 51(1) |
| S(1)  | 1842(1) | 4057(1)  | 6640(1) | 64(1) |
| O(1)  | 7915(4) | 10355(3) | 8347(3) | 62(1) |
| N(1)  | 5834(3) | 4577(3)  | 8045(3) | 36(1) |
| C(1)  | 5204(4) | 3306(3)  | 7916(3) | 38(1) |
| Cl(2) | 3409(1) | 7559(1)  | 8628(1) | 56(1) |
| N(2)  | 7523(3) | 7253(3)  | 7948(3) | 34(1) |
| C(2)  | 3480(4) | 2896(4)  | 7335(3) | 41(1) |
| C(3)  | 2906(5) | 1467(4)  | 7214(4) | 47(1) |
| C(4)  | 1175(6) | 1362(5)  | 6589(5) | 68(1) |
| C(5)  | 452(5)  | 2656(5)  | 6231(5) | 73(1) |
| C(6)  | 7673(4) | 4690(4)  | 8664(4) | 44(1) |
| C(7)  | 8299(4) | 5830(3)  | 7884(4) | 42(1) |
| C(8)  | 8255(4) | 7949(4)  | 9368(3) | 44(1) |
| C(9)  | 7589(5) | 9465(4)  | 9402(4) | 54(1) |
| C(10) | 7206(5) | 9715(4)  | 6993(4) | 55(1) |
| C(11) | 7889(4) | 8228(4)  | 6904(4) | 44(1) |

**TABLE S4.** Atomic coordinates (  $\times 10^4$  ) and equivalent isotropic displacement parameters (  $\text{\AA}^2 \times 10^3$  ) for  $[\text{TEM}(\text{Cd})\text{Br}_2] \cdot \text{CH}_2\text{Cl}_2$ .  $U(\text{eq})$  is defined as one third of the trace of the orthogonalized  $U_{ij}$  tensor.

|       | x       | y       | z       | U(eq) |
|-------|---------|---------|---------|-------|
| Cd(1) | 3909(1) | 6906(1) | 6223(1) | 38(1) |
| Br(1) | 1390(1) | 7368(1) | 6788(1) | 51(1) |
| Cl(1) | -742(1) | 4643(1) | 8074(1) | 65(1) |
| S(1)  | 2622(2) | 4834(1) | 6302(1) | 60(1) |
| O(1)  | 6428(4) | 9303(2) | 6298(2) | 61(1) |
| N(1)  | 4536(3) | 8018(2) | 5235(2) | 34(1) |
| C(1)  | 2902(4) | 5503(3) | 4527(3) | 45(1) |
| Br(2) | 6150(1) | 6364(1) | 7340(1) | 63(1) |
| Cl(2) | -281(2) | 6134(1) | 9292(1) | 89(1) |
| N(2)  | 3543(4) | 6215(2) | 4807(2) | 40(1) |
| C(2)  | 2338(5) | 4844(3) | 5103(3) | 46(1) |
| C(3)  | 1465(5) | 4142(3) | 4760(3) | 52(1) |
| C(4)  | 1042(5) | 3618(3) | 5476(4) | 59(1) |
| C(5)  | 1581(6) | 3903(3) | 6332(3) | 62(1) |
| C(6)  | 4039(5) | 6809(3) | 4100(3) | 48(1) |
| C(7)  | 3701(5) | 7735(3) | 4324(2) | 43(1) |
| C(8)  | 3929(5) | 8871(2) | 5492(3) | 44(1) |
| C(9)  | 4814(5) | 9208(3) | 6379(3) | 58(1) |
| C(10) | 7038(5) | 8494(3) | 6068(3) | 58(1) |
| C(11) | 6223(4) | 8130(3) | 5176(3) | 50(1) |
| C(12) | 202(6)  | 5628(3) | 8307(4) | 73(1) |
